# Supplementary material for: Polarity signaling ensures epidermal homeostasis by coupling cellular mechanics and genomic integrity
Source: PubMed Central journal article supplement (PMC6662827; doi:10.1038/s41467-019-11325-3), 2019-07-29
Supplement: 41467_2019_11325_MOESM1_ESM.pdf [file 41467_2019_11325_MOESM1_ESM.pdf]

## **Polarity signaling ensures epidermal homeostasis by coupling cellular mechanics and genomic integrity**

Dias Gomes, Letzian et al.

### **Supplementary Information**

- Supplementary Figure 1
- Supplementary Figure 2
- Supplementary Figure 3
- Supplementary Figure 4
- Supplementary Figure 5
- Supplementary Figure 6
- Supplementary Figure 7
- Supplementary Figure 8
- Supplementary Figure 9
- Supplementary Figure 10
- Supplementary Figure 11
- Supplementary Figure 12
- Supplementary Table 1
- Supplementary Table 2
- Supplementary Table 3

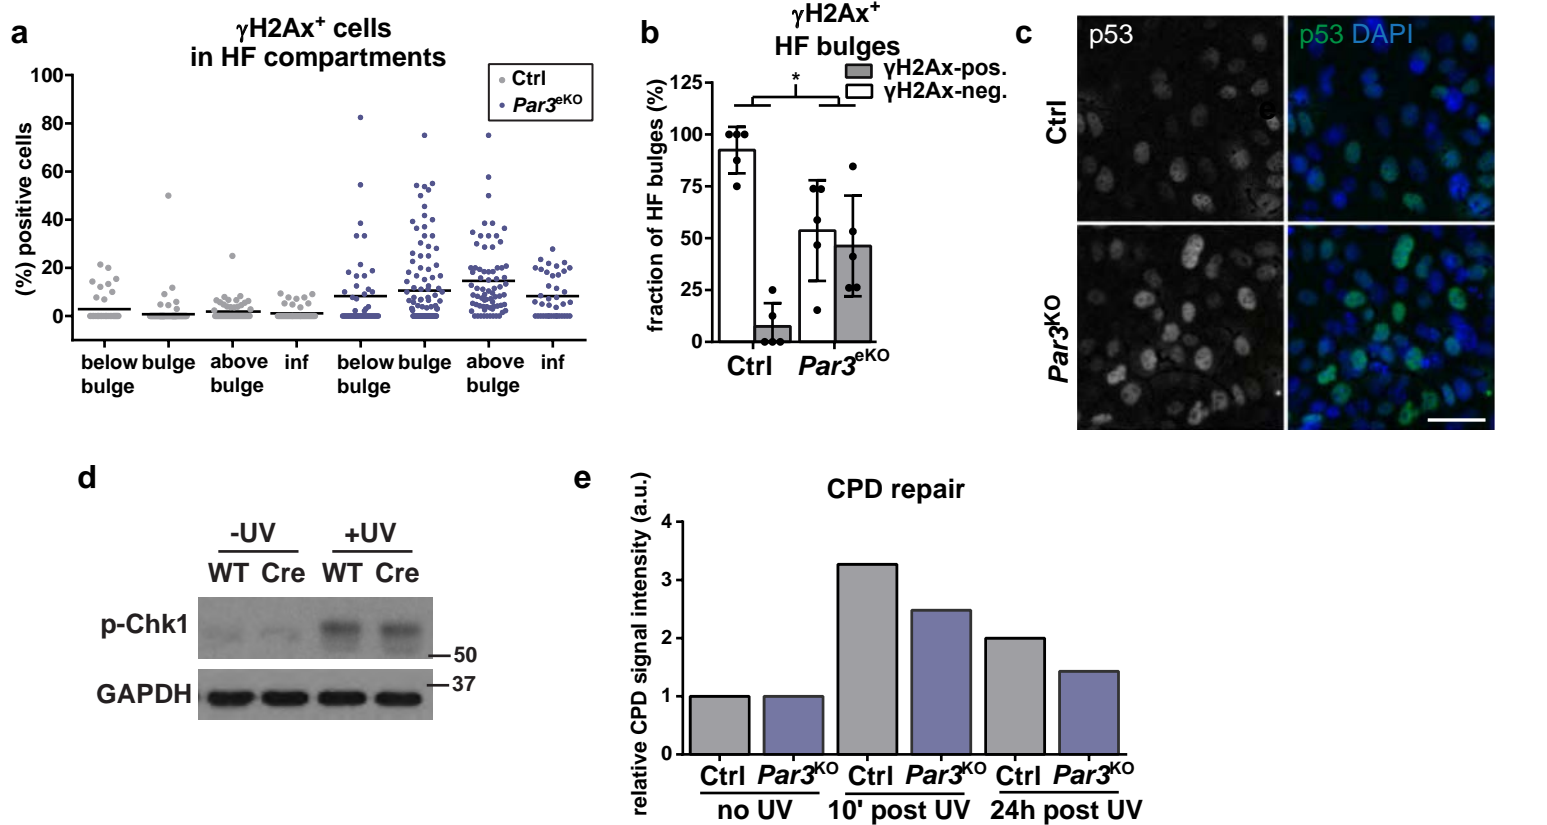

**Supplementary Figure 1.** Increased DNA damage upon Par3 loss. **(a)** Percentage of  $\gamma$ H2Ax-positive cells per HF compartment from *Par3A* knockout (*Par3*<sup>eKO</sup>: K14Cre/+;*Par3*<sup>fl/fl</sup>) and control mice (K14Cre/+). Graph shows percentage of  $\gamma$ H2Ax-positive cells in individual compartments pooled from 5 animals per genotype. Compartments are detailed in Figure 1. Bar represents mean. **(b)** Percentage of HF bulges (K15<sup>high</sup>) with cells positive for  $\gamma$ H2Ax. n=5 mice, \*: p=0.0298; mean $\pm$ SD, two-way ANOVA/Sidak's multiple comparisons test. **(c)** p53 (green) immunofluorescence micrographs of primary *Par3*<sup>KO</sup> and control keratinocytes. DAPI (blue) was used to counterstain nuclei. Scale bar: 50 $\mu$ m. Micrographs were subjected to rolling ball background subtraction, radius=50 $\mu$ m, and are representative for three independent experiments **(d)** Immunoblot analysis of pChk1 in control (K14Cre/+) and wildtype keratinocytes, either non-treated or UV-B treated (100mJ/cm<sup>2</sup>). **(e)** DNA repair assay. Cyclobutane pyrimidine dimer (CPD) signal intensity from slot blot experiment normalized to total DNA. DNA was isolated from *Par3*<sup>KO</sup> and control keratinocytes lysed at indicated time-points after UV-B irradiation (3mJ/cm<sup>2</sup>). Data are representative for 3 individual performed experiments. Western blot micrographs have been cropped. Abbreviations used: Ctrl, control; inf, infundibulum; HF, hair follicle; WT, wild-type.

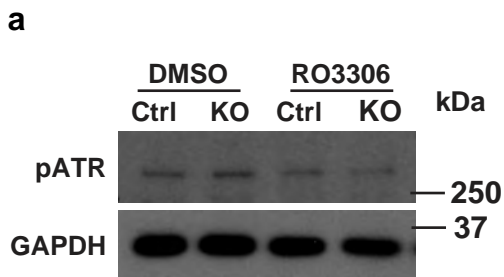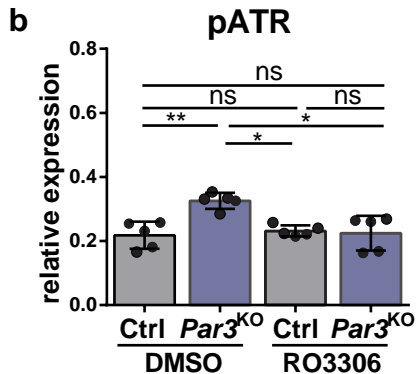

**Supplementary Figure 2.** Mitosis-dependent increase of DNA damage signaling upon Par3 loss. **(a)** Immunoblot analysis of pATR in primary Par3-deficient and control keratinocytes after treatment with Cdk1 inhibitor RO3306 (15 $\mu$ M). GAPDH served as loading control. **(b)** Quantification of (a). pATR levels were first normalized to GAPDH and then expressed as relative values. n=5 biologically independent samples; mean $\pm$ SD; two-way ANOVA/Tukey's multiple comparisons test \*: p=0.0227 (*Par3*<sup>KO</sup>/DMSO vs Ctrl/RO3306); \*: p=0.0145 (*Par3*<sup>KO</sup>/DMSO vs *Par3*<sup>KO</sup>/RO3306); \*\*: p=0.0095 (Ctrl/DMSO vs *Par3*<sup>KO</sup>/DMSO). Cropped immunoblot data are shown. Abbreviations used: Ctrl, control; ns, non-significant; KO, *Par3*<sup>KO</sup>.

**a**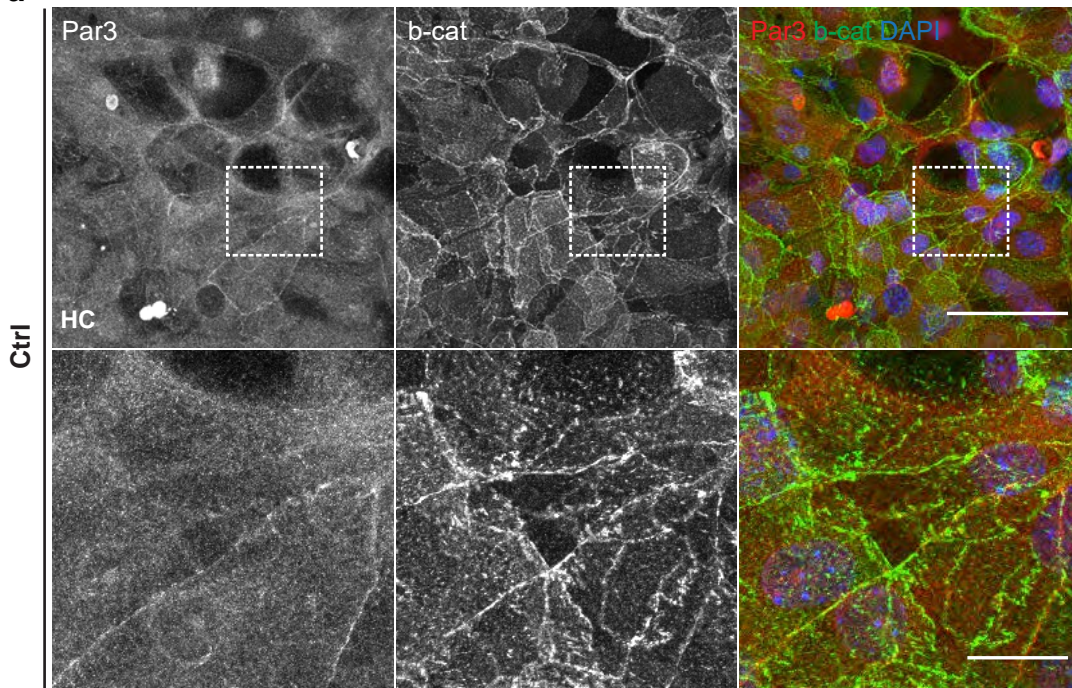

**Supplementary Figure 3.** Par3 localizes to keratinocyte cell-cell contacts. **(a)** Immunofluorescence micrographs of control keratinocytes stained for Par3 (red) and beta-catenin (green). DAPI is shown in blue, individual channels are displayed in gray. Scale bar: 80 $\mu$ m. Lower panel shows magnification (dashed box) of junctional staining for the indicated channels. Scale bar: 40 $\mu$ m. Micrographs are representative for 3 individual experiments. Image intensity was enhanced for better visualization. Abbreviations used: Ctrl, control; HC, High calcium; b-cat, beta-catenin.

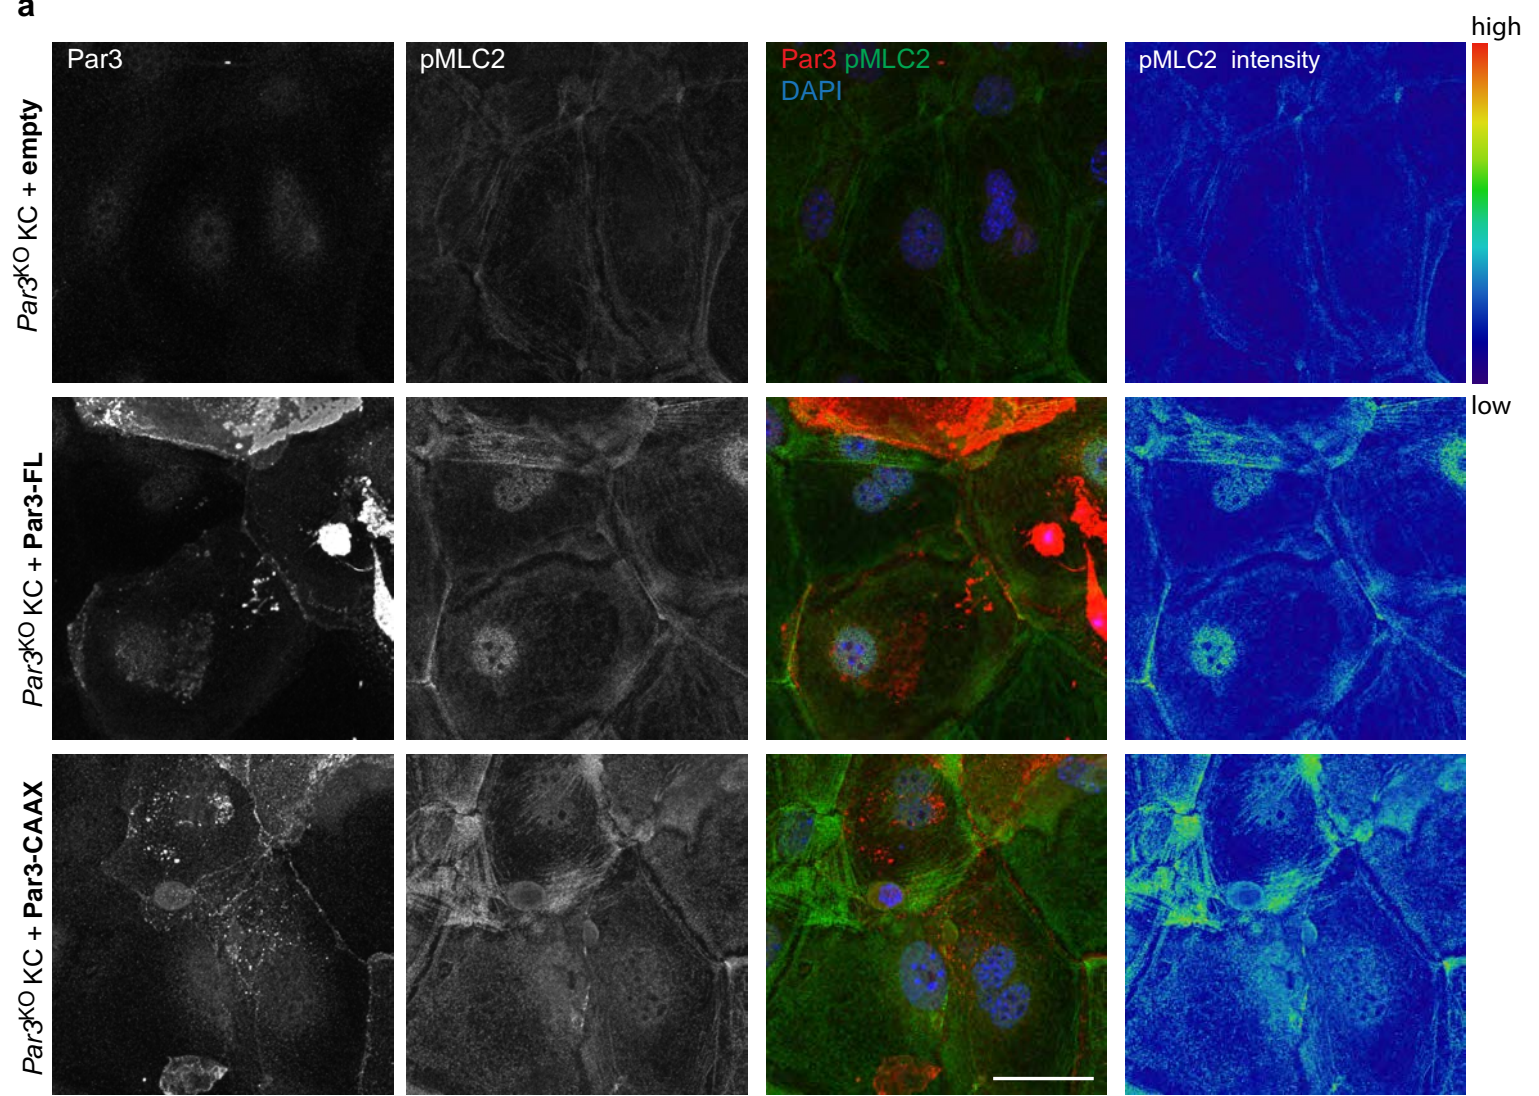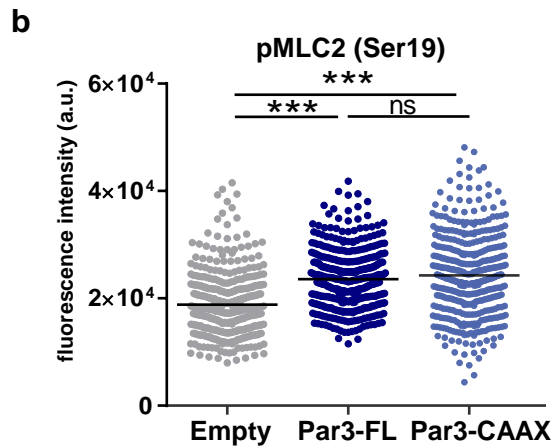

**Supplementary Figure 4.** Ectopic Par3 expression restores junctional pMLC2. **(a)** Immunofluorescence micrographs of *Par3*<sup>KO</sup> keratinocytes transiently transfected with empty vector, Par3 full-length (Par3-FL), or membrane-targeted Par3-CAAX, and stained for Par3 (red) and pMLC2 (green). Panels show individual channels (gray), merge, full-range physics look-up table and pseudo-color scale. Scale bar: 40 $\mu$ m. **(b)** Quantification of pMLC2 immunoreactivity at cell-cell junctions, intensity in arbitrary units; n=433 cells pooled from three independent experiments; \*\*\*: p<0.0001, two-sided Mann-Whitney U test, bar represents mean. Abbreviations used: ns, non-significant; KC, keratinocytes.

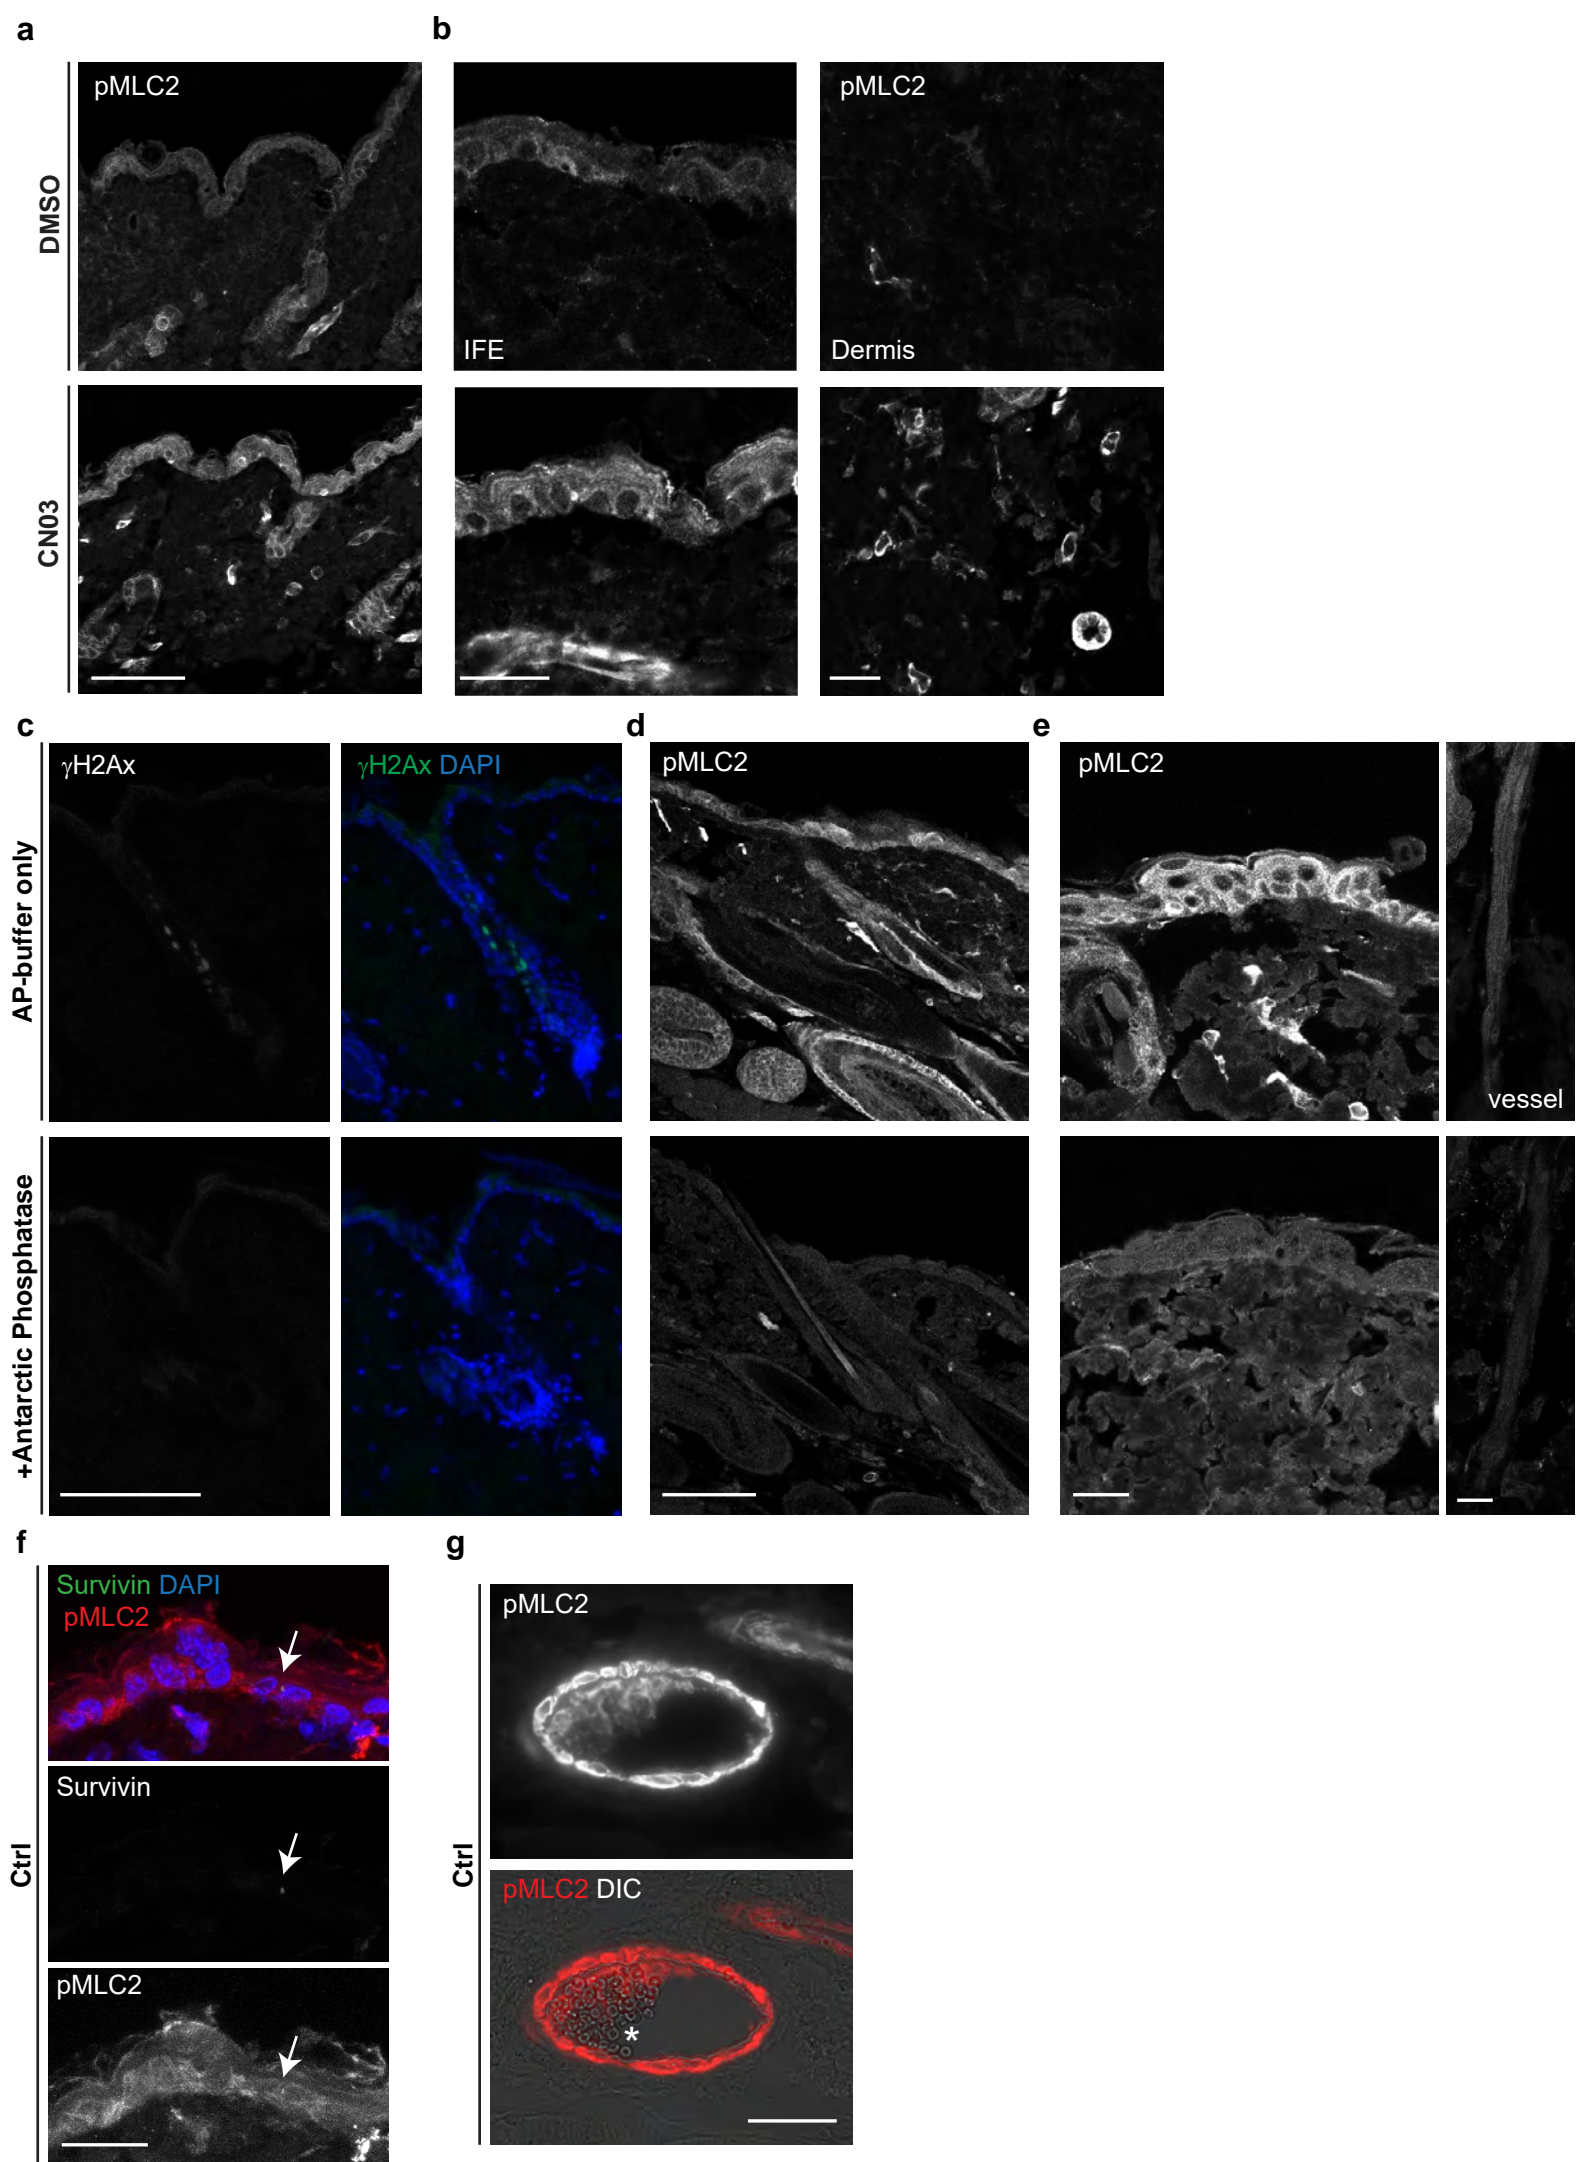

**Supplementary Figure 5.** Validation of pMLC2 antibody in immunohistochemistry of adult skin. **(a-b)** Immunohistochemistry for pMLC2 (Ser19) (gray) (Cell Signaling Technologies #3675). Skin explants of control murine back-skin were treated with DMSO (top panel) or 5 $\mu$ g/ml CN03 (bottom panel). **(a)** Overview micrographs (20x objective). Scale bar: 40 $\mu$ m. **(b)** Higher magnification (63x objective) of IFE (left panel) and dermis (right panel) showing fibroblast-derived signals. Scale bars: 20 $\mu$ m (IFE), 20 $\mu$ m (dermis). Micrographs are representative for two biological replicates. **(c-e)** Dephosphorylation of epitopes in skin sections. Back-skin cross sections were treated with Antarctic phosphatase (AP) in AP-buffer, or with AP-buffer only as control. **(c)** Representative micrographs of  $\gamma$ H2Ax (Ser139) (green) (Cell Signaling Technologies #9718) signals in control sections (upper panel), and following AP treatment (lower panel). 20x objective, scale bar: 40 $\mu$ m. **(d,e)** Representative micrographs of pMLC (Ser19) (gray) (Cell Signaling Technologies #3675) immunostaining in sections incubated with AP buffer only (upper panel), or with phosphatase (lower panel). **(d)** Overview micrographs (20x objective, scale bar: 40 $\mu$ m). **(e)** Higher magnification micrographs of skin epithelium (left panel) and blood vessels (right panel) incubated without or with AP. 63x objective, scale bar: 20 $\mu$ m (skin epithelium), 10 $\mu$ m (blood vessel). Micrographs are representative for four independent experiments. **(f)** Co-immunostaining of mouse  $\alpha$ -pMLC2 (Ser19) (red) (Cell Signaling Technologies #3675) and rabbit  $\alpha$ -Survivin (green) (Cell Signaling Technologies #2808) in adult murine skin cross-section. DAPI is shown in blue, individual channels are shown in gray. Scale bar: 20 $\mu$ m. Micrographs are representative for five biological replicates. **(g)** Immunohistochemistry of adult murine skin cross-sections stained for pMLC2 (Ser19) (top panel gray, bottom panel red) (Cell Signaling Technologies #3675). Micrographs show pMLC immunostaining in smooth muscle layers of large skin blood vessels individually (upper panel) and merged with DIC (lower panel). Asterisk (\*) marks erythrocytes within the blood vessel. 63x objective, scale bar: 50 $\mu$ m. Micrographs are representative for three biological replicates. Abbreviation used: Ctrl, control; IFE, interfollicular epidermis; HF, hair follicle; DIC, differential interference contrast.

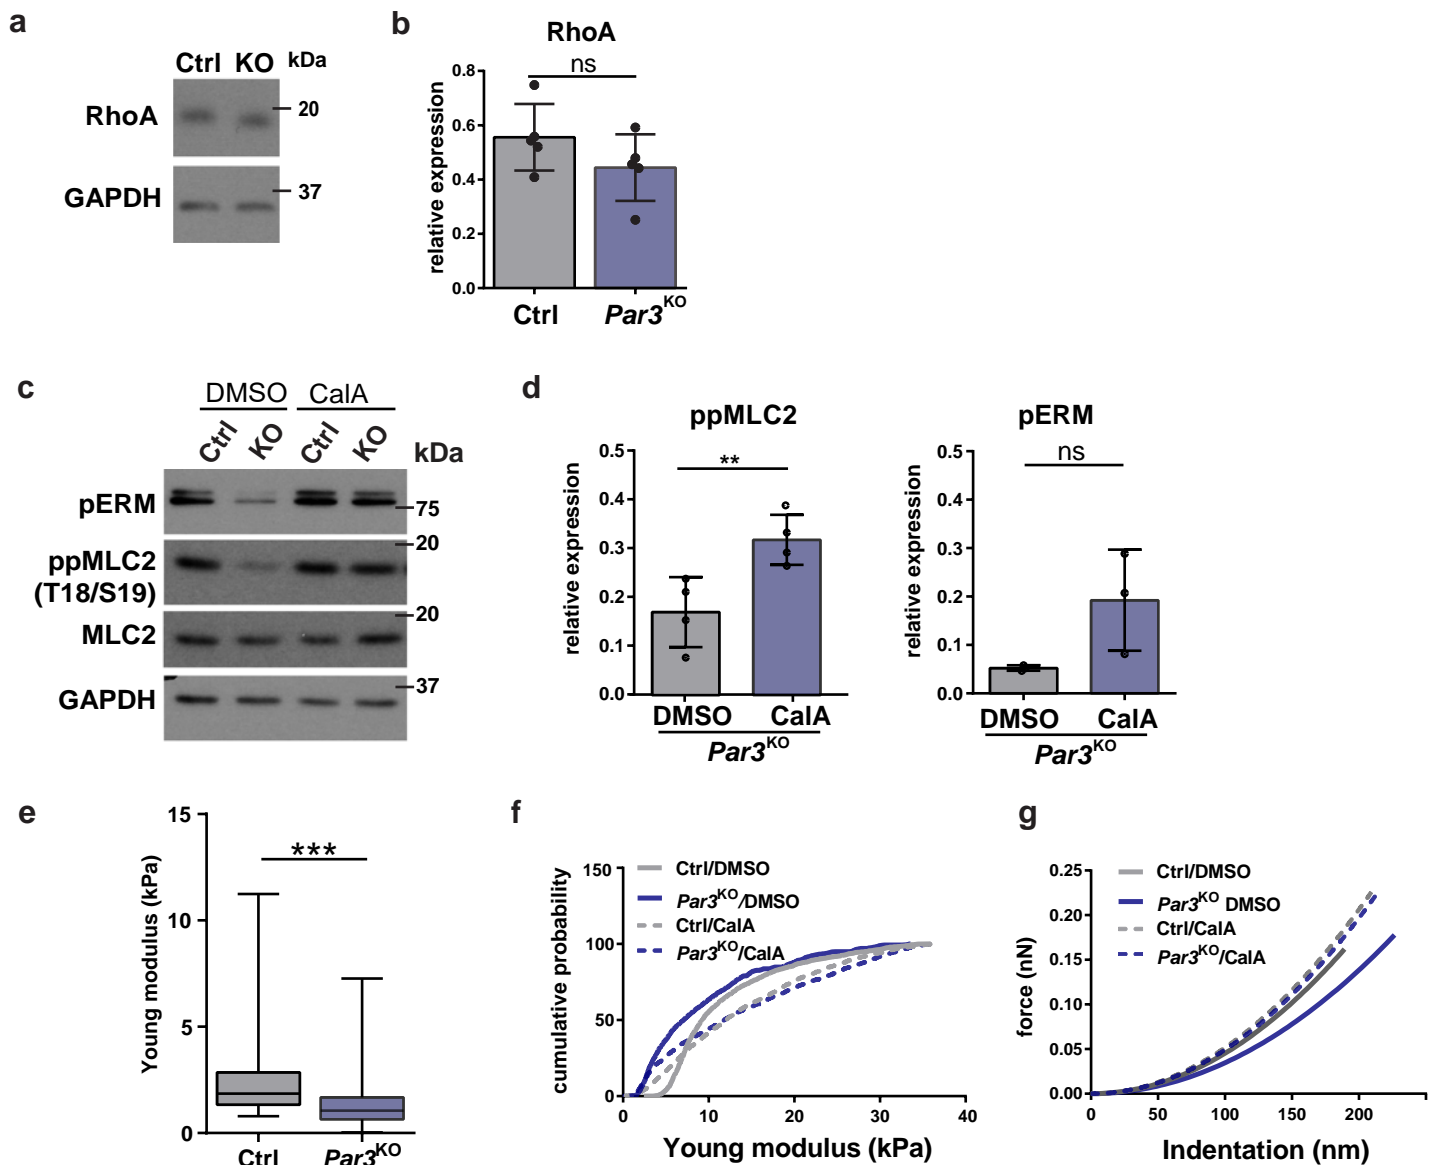

**Supplementary Figure 6.** Par3 loss impairs myosin activity and viscoelastic properties of keratinocytes. **(a)** Immunoblot analysis of RhoA in keratinocyte lysates. GAPDH served as loading control. **(b)** Quantification of (a). RhoA levels were first normalized to GAPDH and then expressed as relative values.  $n=5$  biologically independent samples; mean $\pm$ SD; paired two-tailed Student's t-test, ns:  $p=0.3661$ . **(c)** Immunoblot analysis of pERM, ppMLC2 (Thr18/Ser19), and MLC2 in keratinocyte lysates following 24h CalA (1nM) treatment. GAPDH served as loading control. Micrograph is representative for 3 individual experiments. **(d)** Quantification of (c). ppMLC2 (Thr18/Ser19) levels were normalized to GAPDH and then expressed as relative values.  $n=4$  biologically independent samples; mean $\pm$ SD; paired two-tailed Student's t-test, \*\*:  $p=0.0081$ . pERM levels were first normalized to GAPDH and then expressed as relative values.  $n=3$  biologically independent samples, paired two-tailed Student's t-test, ns:  $p=0.1412$  mean $\pm$ SD. **(e)** Young Modulus box-plot based on force indentation spectroscopy with a spherical tip (Ctrl:  $n=467$  measurements,  $Par3^{KO}=594$  measurements, pooled from three independent experiments \*\*\*,  $p<0.0001$ , Mann-Whitney U-test, box plots show minimum (boundary of lower whisker), 25th percentile (lower boundary of box), median (center line), 75th percentile (upper boundary of box) and maximum (boundary of upper whisker). **(f)** Cumulative probability of Young Moduli extracted from Hertzian fits from force spectroscopy indentations ( $n=2000$  force curves, pooled from three independent experiments). **(g)** Indentation force plots showing mean Hertzian fits ( $n=8$  representative force indents per condition). Cropped immunoblot data are shown. Abbreviations used: Ctrl, control; KO,  $Par3^{KO}$ ; ns, non-significant; CalA, Calyculin A.



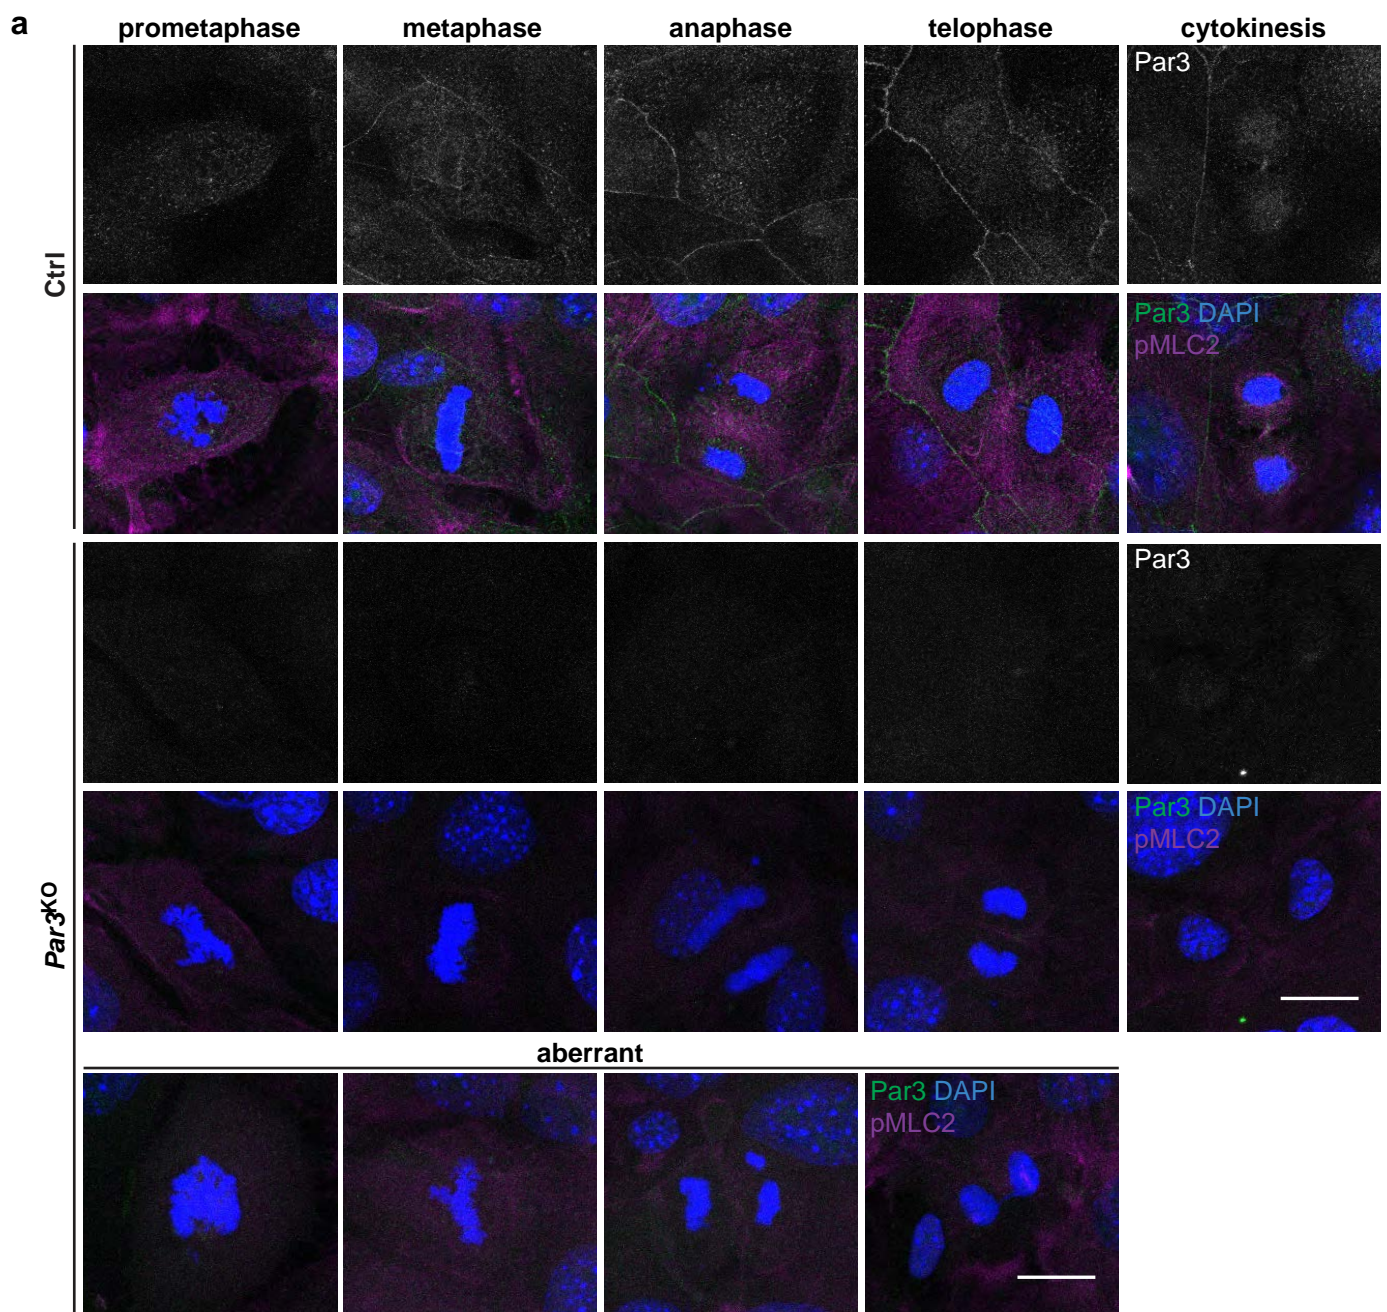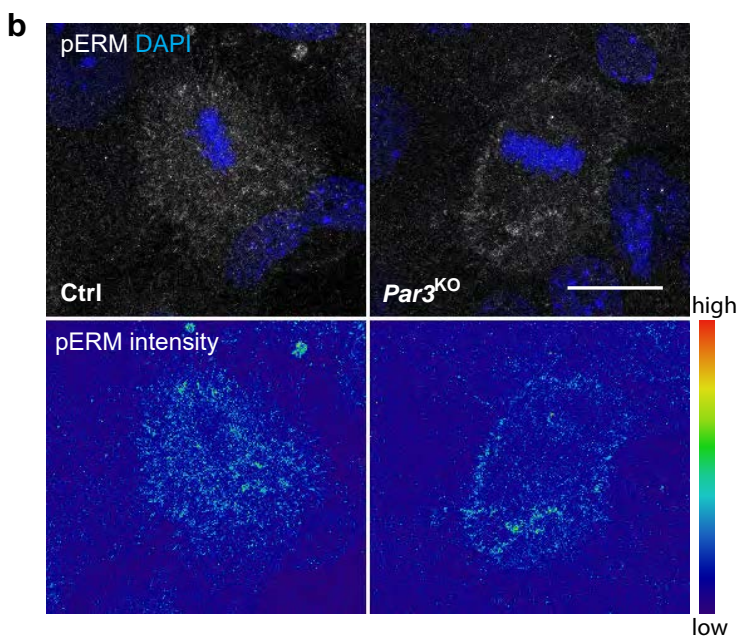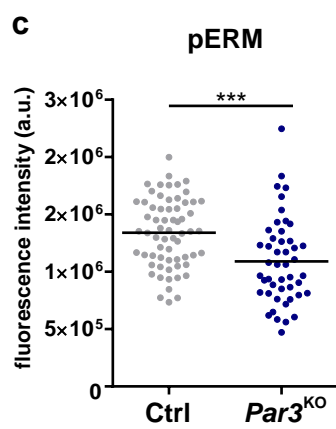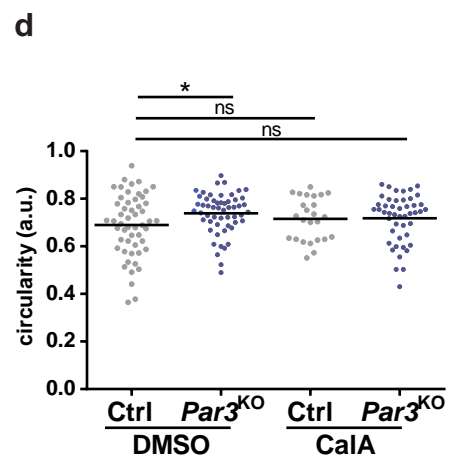

**Supplementary Figure 7.** Localization of Par3, phosphorylated MLC2 and phosphorylated ERM during mitosis. **(a)** Immunofluorescence analysis of Par3 (green) and pMLC2 (magenta) in primary *Par3*<sup>KO</sup> and control keratinocytes during mitosis. DAPI is shown in blue, individual channels are displayed in gray. Micrographs show Par3 and pMLC2 localization during different phases of mitosis and are representative for three individual experiments. Scale bar: 40µm **(b)** Immunofluorescence micrographs of pERM (gray) in primary murine keratinocytes, physics look-up table and pseudo-color scale. Scale bar: 40µm. **(c)** Quantification of pERM immunoreactivity, intensity in arbitrary units; n=64 cells (Ctrl), n=47 cells (*Par3*<sup>KO</sup>) cells pooled from three independent experiments; \*\*\*: p<0.0001, two-sided Mann–Whitney U-test, bar represents mean. **(d)** Mitotic spindle circularity measurements in Ctrl and *Par3*<sup>KO</sup> keratinocytes after DMSO or CalA (1nM) treatment (Ctrl/DMSO: n=53 cells, *Par3*<sup>KO</sup>/DMSO: n=55 cells, Ctrl/CalA: n=25 cells, *Par3*<sup>KO</sup>/CalA: n=47 cells, pooled from four independent experiments, \*: p=0.0432 (Ctrl/DMSO vs. *Par3*<sup>KO</sup>/DMSO), two-tailed one-way ANOVA, bar represents mean. Abbreviations used: Ctrl, control; ns, non-significant; CalA, Calyculin A.

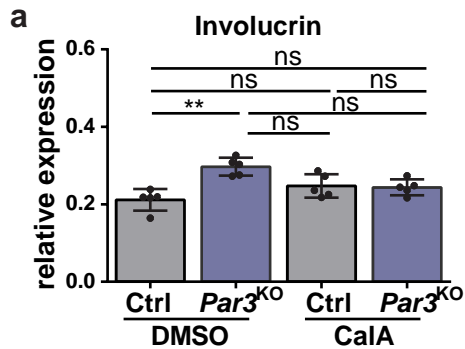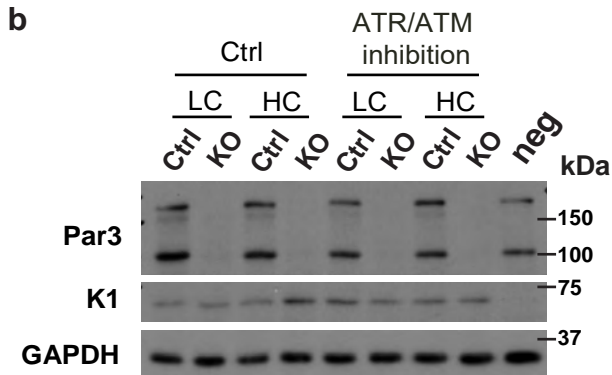

**Supplementary Figure 8.** CalyculinA or ATM/ATR inhibition normalize epidermal differentiation in the absence of Par3. **(a)** Quantification of immunoblot analysis for Involucrin expression in keratinocyte lysates following 48h CalA treatment. GAPDH served as loading control. Involucrin levels were first normalized to GAPDH and then expressed as relative values. n=5 biologically independent samples; mean±SD; \*\*: p=0.0031 (Ctrl vs. *Par3*<sup>KO</sup>, DMSO-treated); mean±SD; two-way ANOVA/Tukey's multiple comparisons test. **(b)** Immunoblot analysis for Keratin1 upon ATR/ATM inhibition. GAPDH served as loading control. Cropped immunoblot data are shown. Abbreviations used: Ctrl, control; KO, *Par3*<sup>KO</sup>; ns, non-significant; CalA, Calyculin A; neg, negative control; ATM, Ataxia telangiectasia mutated; ATR, ATM and RAD3-related.

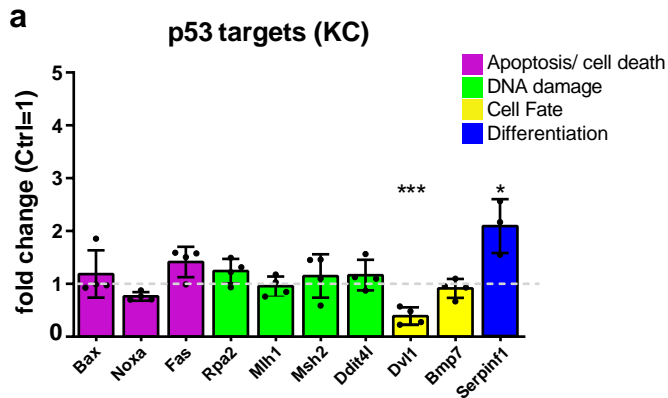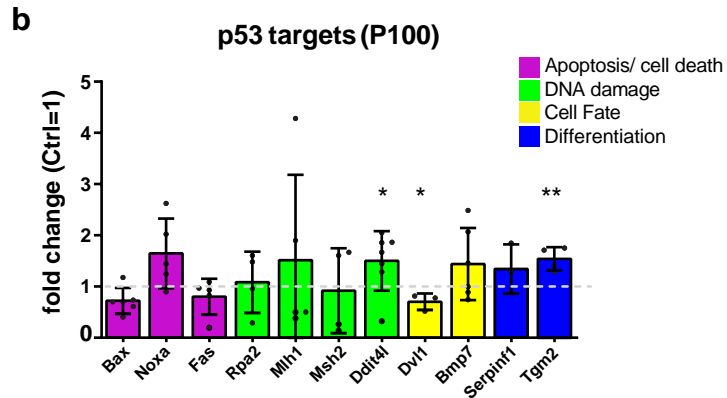

**Supplementary Figure 9.** Expression of selected p53 targets in *Par3*-deficient keratinocytes and epidermis. **(a, b)** qRT-PCR analysis of p53 target genes in primary *Par3*<sup>KO</sup> and control keratinocytes (a) and P100 skin epidermis of *Par3*<sup>eKO</sup> and control mice (b). Target genes are categorized in apoptosis and cell death (magenta), DNA damage (green), cell fate (yellow) and differentiation (blue) as indicated. Gene expression was normalized to HPRT (loading control) and then normalized to control keratinocytes or epidermis, respectively. n=3(Serpinf1, in a; Dvl1, Serpinf1, in b) n=4(Bax, Noxa, Fas, Rpa2, Mlh1, Msh2, Ddit4l, Dvl1, Bmp7, in a; Rpa2, Msh2, Tgm2, in b), n=5 (Noxa, Fas, Mlh1, in b), n=6 (Bax, Bmp7, in b), n=7 (Ddit4l, in b), \*\*\*: p=0.0003(Dvl1, in a), \*: p=0.0216(Serpinf1, in a) \*: p=0.0419(Ddit4l, in b), \*: p=0.0327(Dvl1, in b), \*\*: p=0.0031(Tgm2, in b), (a): n= biologically independent samples, (b) n= mice, mean±SD; unpaired two-tailed Student's t-test. Abbreviations used: Ctrl, control; KC, keratinocytes.

**Figure 1h**

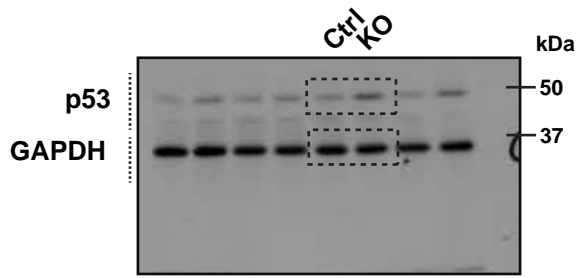

**Figure 1j**

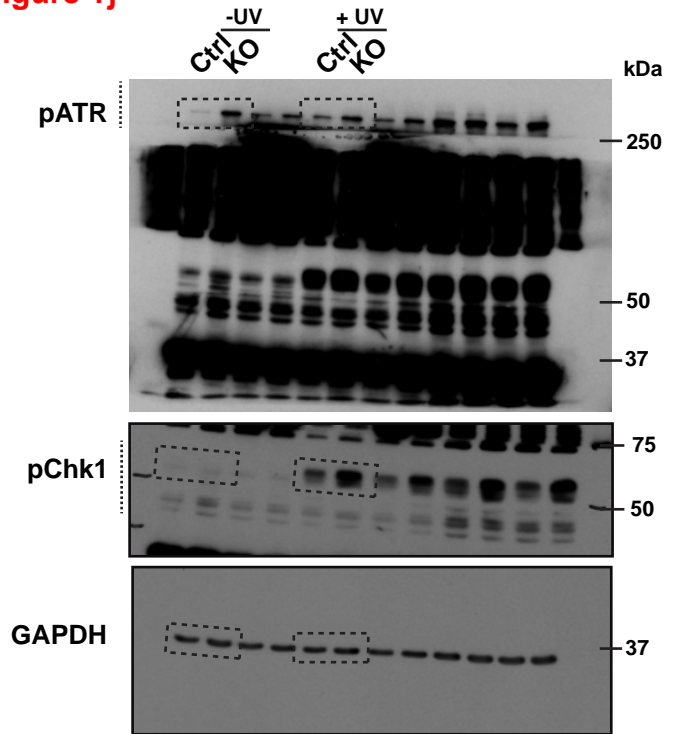

**Figure 2f**

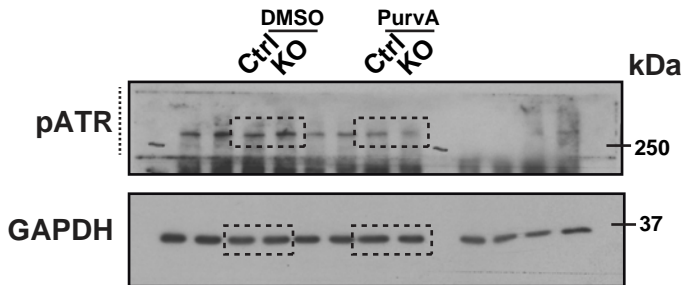

**Figure 3h**

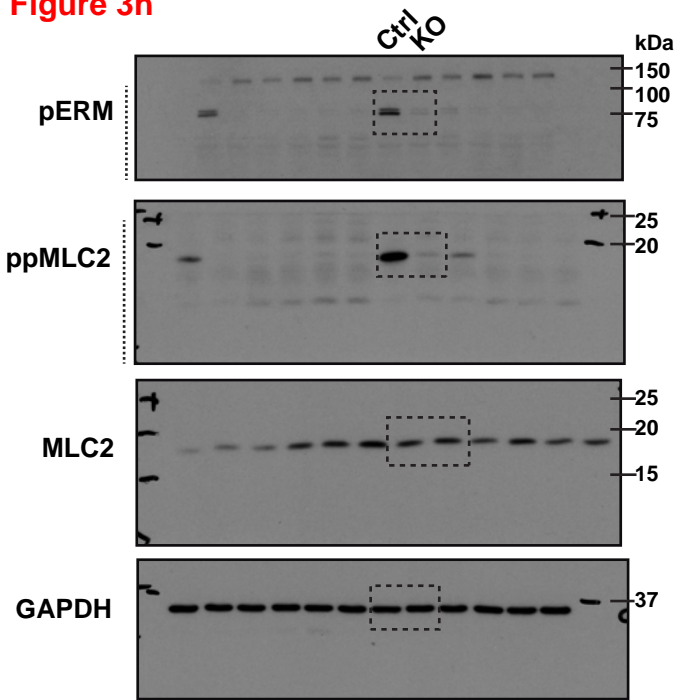

**Figure 3k**

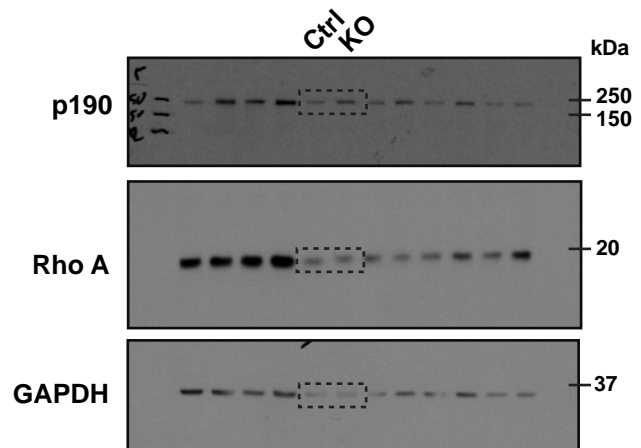

**Figure 6e**

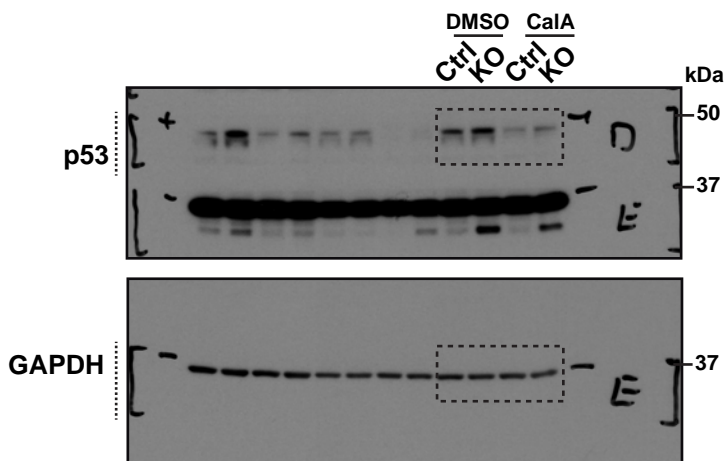

**Figure 6h**

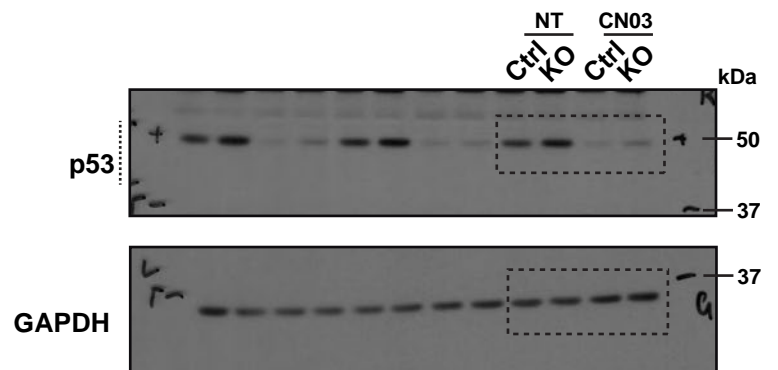

**Figure 7a**

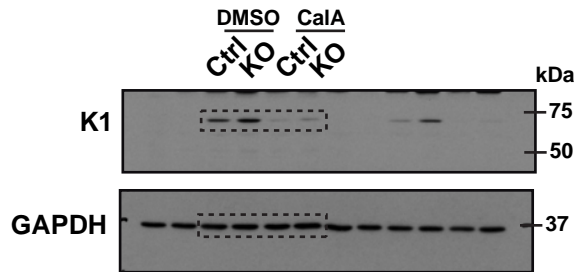

**Figure 7c**

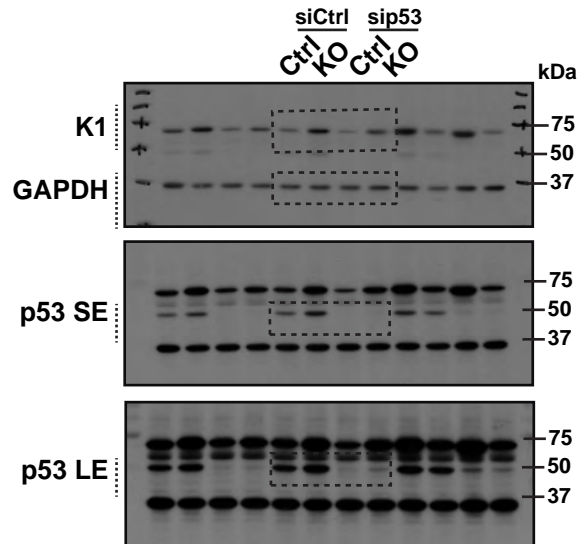

**Supplementary Figure 11.** Original western blots of the manuscript (2 of 3). Left vertical lines refer to the part of the membrane that was incubated with the antibody indicated next to it.

**Supplementary Figure 1d**

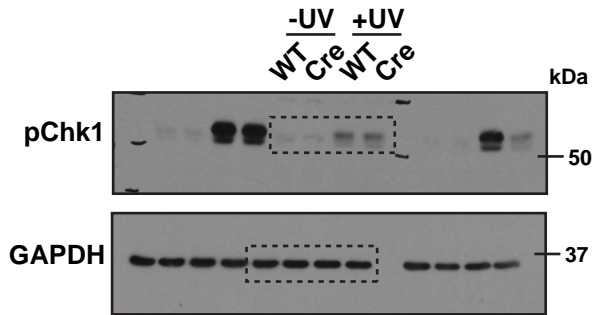

**Supplementary Figure 2a**

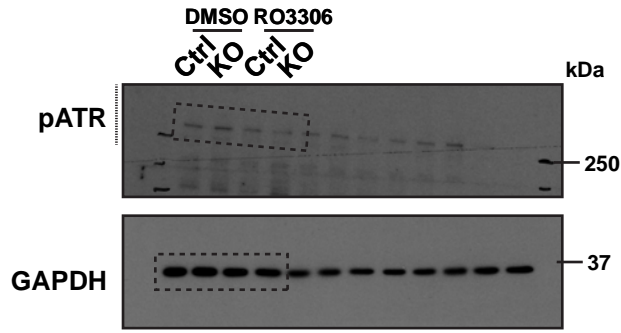

**Supplementary Figure 6a**

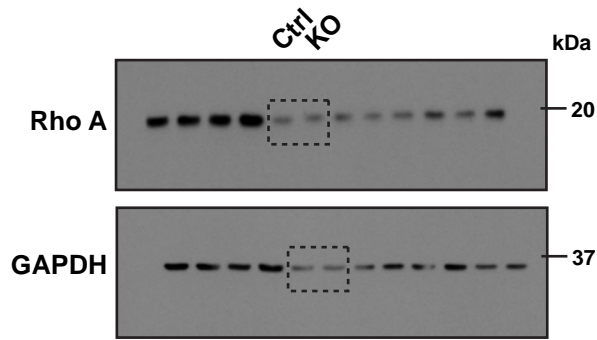

**Supplementary Figure 6c**

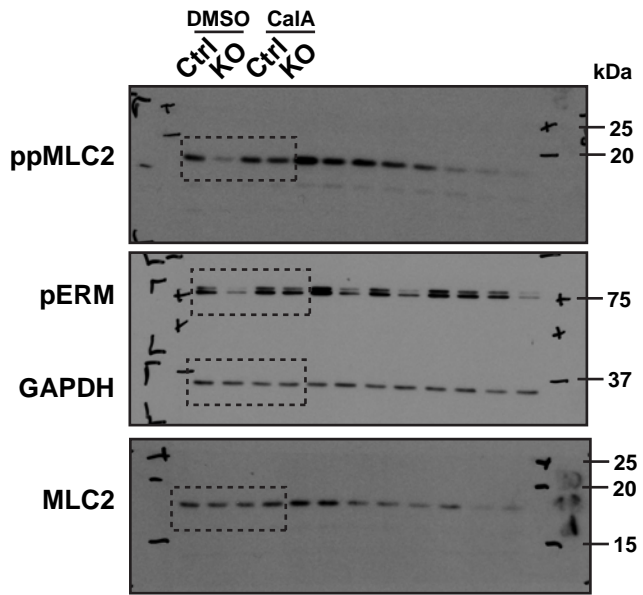

**Supplementary Figure 8b**

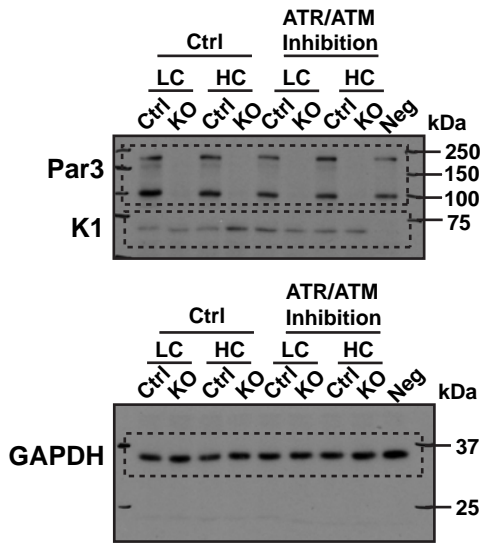

**Supplementary Figure 12:** Original western blots of the manuscript (3 of 3). Left vertical lines refer to the part of the membrane that was incubated with the antibody indicated next to it.

**Supplementary Table 1. Antibodies and imaging reagents used in this study.**

| Primary antibodies (supplier)                                            | Catalog nr.        | Clone/Ref.             | Lot nr.   | Species   | Dilution               |
|--------------------------------------------------------------------------|--------------------|------------------------|-----------|-----------|------------------------|
| Alpha-Tubulin (Sigma)                                                    | T6793              | B-5-1-2                | 034M4837  | mouse     | IF 1:1000              |
| Beta-catenin (BD Pharmingen)                                             | 610154             | C19220                 | 14        | mouse     | IF:500                 |
| CD34 Monoclonal Antibody, Biotin-conj. (eBioscience)                     | 13-0341-85         | RAM34                  | E032254   | rat       | IF 1:50                |
| Chk1 (Cell Signaling Techn.)                                             | 2360               | 2G1D5/<br>10/2015      | 3         | mouse     | WB 1:1000              |
| CPD (Cosmo Bio)                                                          | NM-DND-001         | TDM-2                  | TM-C-08   | mouse     | SB 1:10000             |
| GAPDH (Millipore)                                                        | MAB374             | 6C5                    | 2322571   | mouse     | WB 1:18.000            |
| γH2Ax (S139) (Cell Signaling Techn.)                                     | 9718               | 20E3/<br>07/2017       | 13        | rabbit    | IF 1:500               |
| Involucrin (Covance)                                                     | PRB 140C-200       | Polyclonal             | N/A       | rabbit    | WB 1:1000              |
| Keratin-1 (Covance)                                                      | PRB-165P           | Polyclonal             | N/A       | rabbit    | WB 1:1000              |
| Keratin-15 (Thermo Scientific)                                           | MA1-90929          | Monoclonal             | PL1944821 | mouse     | IF 1:1000              |
| MLC2 (Cell Signaling Techn.)                                             | 3672               | Polyclonal/<br>09/2017 | 4         | rabbit    | WB 1:1000              |
| Par3 (Millipore)                                                         | 07-330             | Polyclonal             | 2615671   | rabbit    | IF 1: 300              |
| Pericentrin (BioLegend)                                                  | 923701             | Poly 19237             | B200667   | rabbit    | IF 1:300               |
| pEzrin (Thr567)/Radixin (Thr567)/Moesin (Thr558) (Cell Signaling)        | 3726               | 48G2/ 01/2018          | 5         | rabbit    | IF 1:300<br>IHC 1:200  |
| pEzrin (Thr567)/Radixin (Thr567)/Moesin (Thr558) (Cell Signaling Techn.) | 3141               | T558/<br>04/2018       | 15        | rabbit    | WB 1:1000              |
| p53 (Leica)                                                              | NCL-L-p53-<br>CM5p | Polyclonal             | 6044554   | rabbit    | IF 1:200<br>WB 1:1000  |
| P190 RhoGAP (BD Transduction Laboratories)                               | 610150             | monoclonal             | 7201860   | mouse     | WB 1:2000              |
| RhoA (Cell Signaling Techn.)                                             | 2117T              | 67B9                   | 5         | rabbit    | WB 1:1000              |
| RhoA (Cytoskeleton Inc.)                                                 | GL501              | N/A                    | 005       | mouse     | GLISA 1:250            |
| pATR (Ser428) (Cell Signaling Techn.)                                    | 2853               | Polyclonal<br>02/2014  | 5         | rabbit    | WB 1:1000              |
| pChk1 (Ser345) (Cell Signaling Techn.)                                   | 2348               | 133D3/<br>09/2015      | 15        | rabbit    | WB 1:1000              |
| pMLC2 (Ser19) (Cell Signaling Techn.)                                    | 3675               | Polyclonal/<br>09/2016 | 5         | mouse     | IF 1:300<br>IHC 1:200  |
| ppMLC2 (Thr18/Ser19) (Cell Signaling Techn.)                             | 3674               | Polyclonal/<br>10/2017 | 5         | rabbit    | WB 1:1000<br>IHC 1:100 |
| Survivin (Cell Signaling Techn.)                                         | 2808               | 71G4B7                 | N/A       | rabbit    | IF 1:100               |
| <b>Secondary antibodies for immunofluorescence analyses</b>              |                    |                        |           |           |                        |
| AlexaFluor 488 α-mouse (Invitrogen)                                      | A21202             | Polyclonal             | 1741782   | donkey    | IF 1:500               |
| AlexaFluor 488 α-rabbit (Invitrogen)                                     | A21206             | Polyclonal             | 1910751   | donkey    | IF 1:500               |
| AlexaFluor 568 α-rabbit (Invitrogen)                                     | A11036             | Polyclonal             | 1832035   | goat      | IF 1:500               |
| AlexaFluor 568 α-rat (Invitrogen)                                        | A11077             | Polyclonal             | 870966    | goat      | IF 1:500               |
| AlexaFluor 594 α-mouse (Invitrogen)                                      | A21203             | Polyclonal             | 1165596   | donkey    | IF 1:500               |
| AlexaFluor 594 α-rabbit (Invitrogen)                                     | A21207             | Polyclonal             | N/A       | donkey    | IF 1:500               |
| AlexaFluor 647 α-mouse (Invitrogen)                                      | A21235             | Polyclonal             | N/A       | goat      | IF 1:500               |
| AlexaFluor 647 α-rabbit (Invitrogen)                                     | A31573             | Polyclonal             | N/A       | donkey    | IF 1:500               |
| <b>Secondary antibodies for immunoblot analyses</b>                      |                    |                        |           |           |                        |
| HRP α-rabbit (GE Healthcare)                                             | NA9340V            | Polyclonal             | 9720820   | donkey    | WB 1:4000              |
| HRP α-mouse (GE Healthcare)                                              | NA931V             | Polyclonal             | 11076057  | sheep     | WB 1:4000              |
| <b>Other Reagents</b>                                                    |                    |                        |           |           |                        |
| DAPI (Roth)                                                              | D1306              | N/A                    | N/A       | N/A       | 2μg/ml                 |
| HRP α-mouse (Cytoskeleton Inc.)                                          | GL02               | N/A                    | 055       | N/A       | GLISA 1:62.5           |
| <b>iFISH probes:</b> Tik2 (11qE1) / Aurka (2qH3) Mouse probe (Leica)     | KBI-30501          | N/A                    | 59325     | DNA probe | 1:1                    |



**Supplementary Table 2.**

TaqMan® Gene Expression Assays (ThermoFisher Scientific) used in this study.

| Target gene   | ID            | Cat. No. | label |
|---------------|---------------|----------|-------|
| Tgm2          | Mm00436979_m1 | 4448892  | Fam   |
| Dvl1          | Mm00438592_m1 | 4448892  | Fam   |
| Serpinf1      | Mm00441270_m1 | 4448892  | Fam   |
| Rpa2          | Mm00488047_m1 | 4448892  | Fam   |
| Ddit4l        | Mm00513313_m1 | 4448892  | Fam   |
| Fas           | Mm01204974_m1 | 4448892  | Fam   |
| Bmp7          | Mm00432102_m1 | 4453320  | Fam   |
| Pmaip1 (Noxa) | Mm00451763_m1 | 4453320  | Fam   |
| Hprt          | Mm00446968_m1 | 4448489  | Vic   |
| Mlh1          | Mm00503449_m1 | 4448892  | Fam   |
| Msh2          | Mm00500563_m1 | 4448892  | Fam   |

**Supplementary Table 3.** Primers used in this study.

| Name                             | Purpose                             | Sequence 5'-3'                                            |
|----------------------------------|-------------------------------------|-----------------------------------------------------------|
| CAAX hRas PCR 2 forw             | Cloning/ CAAX PCR 2                 | CTT CTA CTC CCC TAG GGG CTG CAT GAG C                     |
| CAAX hRas PCR 2 rev              | Cloning/ CAAX PCR 2                 | GCG GCC GCT CAG GAG AGC ACA CAC TTG<br>CAG CTC ATG CAG CC |
| PCR1/3 fw NEU 160615             | Cloning/ CAAX PCR 1+3               | ACG GGA ACA TTC CTT TCC AC                                |
| PCR1 hRas CAAX rev<br>NEU150615  | Cloning/ CAAX PCR 1                 | AGC CCC TAG GGG AGT AGA AGG GCC G                         |
| PCR 3 hRas CAAX rev<br>NEU150615 | Cloning/ CAAX PCR 3                 | GCG GCC GCT CAG G                                         |
| Cre-3                            | K14 Cre/ Genotyping                 | CGA TGC AAC GAG TGA TGA GGT TC                            |
| Cre-5                            | K14 Cre/Genotyping                  | GCA CGT TCA CCG GCA TCA AC                                |
| +598iR                           | Par3A deletion PCR/Genotyping       | TAC CGT TAA CTG CAG CTC GGC TCT G                         |
| 0509iR                           | Par3A deletion PCR/Genotyping       | AGC TGG CGC TGG TAC CAT CTC CTC C                         |
| -423iF                           | Par3A Deletion, Flox PCR/Genotyping | AGG CTA GCC TGG GTG ATT TGA GAC C                         |
| -159iR                           | Par3A Flox PCR/Genotyping           | TTC CCT GAG GCC TGA CAC TCC AGT C                         |
